# Supplementary material for: Carbonaceous particulate matter promotes the horizontal transfer of antibiotic resistance genes
Source: Royal Society of Chemistry journal article supplement (doi:10.1039/d3em00547j), 2024-01-01
Supplement: d3em00547j1.pdf [file d3em00547j1.pdf]

Supporting Information for

Carbonaceous particulate matters promote horizontal transfer of antibiotic resistance genes

**Table S1. Primer sequences used in this study (Rubini et al. 2019, Zhang et al. 2018).**

| Category                                  | Gene            | Primer         | Sequence of Primer (5'-3') |
|-------------------------------------------|-----------------|----------------|----------------------------|
| cfuOxidative stress-related genes         | <i>soxS</i>     | <i>soxS-F</i>  | AATCGGACGCTCGGTGGT         |
|                                           |                 | <i>soxS-R</i>  | AAATCAGGCTATTCAAAGTGGT     |
|                                           | <i>soxR</i>     | <i>soxR-F</i>  | ATTGGTGAAGCGTTTGGC         |
|                                           |                 | <i>soxR-R</i>  | CAATACATCCGTCCAGTTCGT      |
| SOS response-related genes                | <i>recA</i>     | <i>recA-F</i>  | CGCTTTCGGCGTCAGT           |
|                                           |                 | <i>recA-R</i>  | ACAACCTGCTGTGCTCCC         |
|                                           | <i>lexA</i>     | <i>lexA-F</i>  | AATGCTGATTTCTGCTGC         |
|                                           |                 | <i>lexA-R</i>  | CGACTTTATTGCCCTGTTTT       |
| Outer membrane protein genes              | <i>ompA</i>     | <i>ompA-F</i>  | TGAGCCTGGGTGTTTCCTA        |
|                                           |                 | <i>ompA-R</i>  | CAGAGCAGCCTGACCTTCC        |
|                                           | <i>ompC</i>     | <i>ompC-F</i>  | AAGTAGTAGGTAGCACCAACATCA   |
|                                           |                 | <i>ompC-R</i>  | GGGCGAACAAAGCACAGAA        |
| Mating pair formation (Mpf) system genes  | <i>trbBp</i>    | <i>trbBp-F</i> | CGCGGTCGCCATCTTCACG        |
|                                           |                 | <i>trbBp-R</i> | TGCCCGAGCCAGTACCGCCAATG    |
| DNA transfer and replication (Dtr) system | <i>trfAp</i>    | <i>trfAp-F</i> | GAAGCCCATCGCCGTCGCCTGTAG   |
|                                           |                 | <i>trfAp-R</i> | GCCGACGATGACGAACTGGTGTGG   |
| Pilin synthesis-related genes             | <i>fimA</i>     | <i>fimA-F</i>  | ACTACACCCTGCGTTTCGAC       |
|                                           |                 | <i>fimA-R</i>  | GCGTTAGAGTTTGCCTGACC       |
|                                           | <i>fimH</i>     | <i>fimH-F</i>  | GTGCCAATTCCTCTTACCGTT      |
|                                           |                 | <i>fimH-R</i>  | TGGAATAATCGTACCGTTGCG      |
|                                           | <i>pilA</i>     | <i>pilA-F</i>  | CGAATCATAACCAACGTACTGGC    |
|                                           |                 | <i>PilA-R</i>  | GGCACCAACTGCATAATAACGC     |
| 16S rRNA                                  | <i>16S rRNA</i> | <i>16s-F</i>   | CCTACGGGAGGCAGCAG          |
|                                           |                 | <i>16s-R</i>   | ATTACCGCGGCTGCTGG          |

Figure S1. Effect of CPM on bacterial survival

The density of the bacterial solution was  $10^8$  CFU/mL and the final concentration of CPM was 320mg/L at 25°C. Some of the bacterial solutions were removed for colony counting at 1, 2, 4, 8, 12, 24, 32 and 48h respectively. Different selection plates were used to distinguish the two types of cells and the number of donor and recipient bacteria were counted separately.

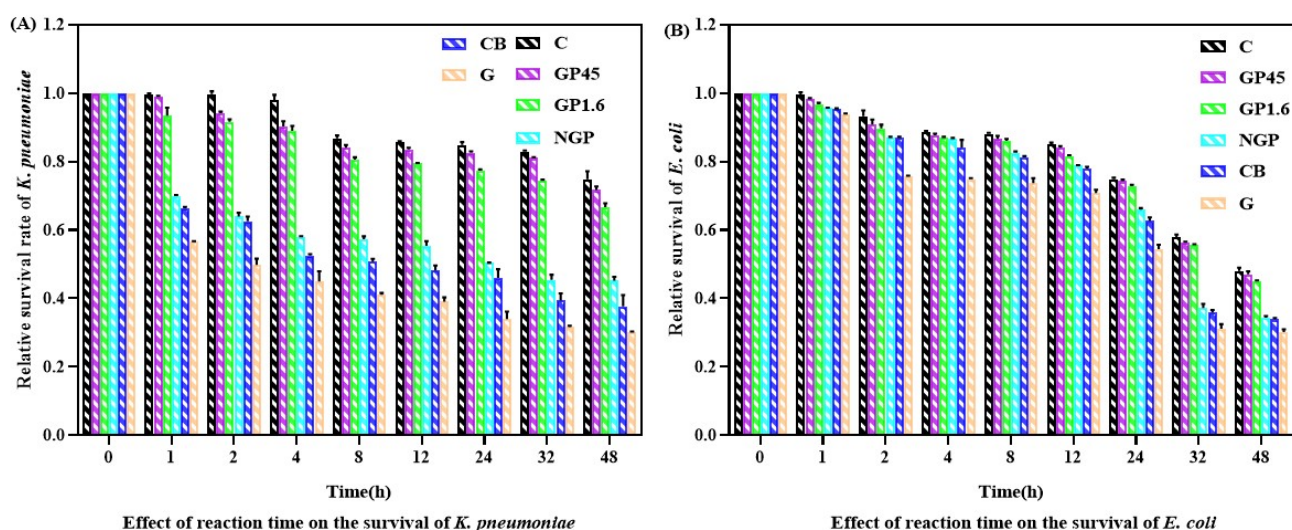

- A. Effects of CPM on the survival of receptor strain *K. pneumoniae* in different time periods.  
B. Effects of CPM on the survival of donor strain *E. coli* in different time periods.

Figure S2

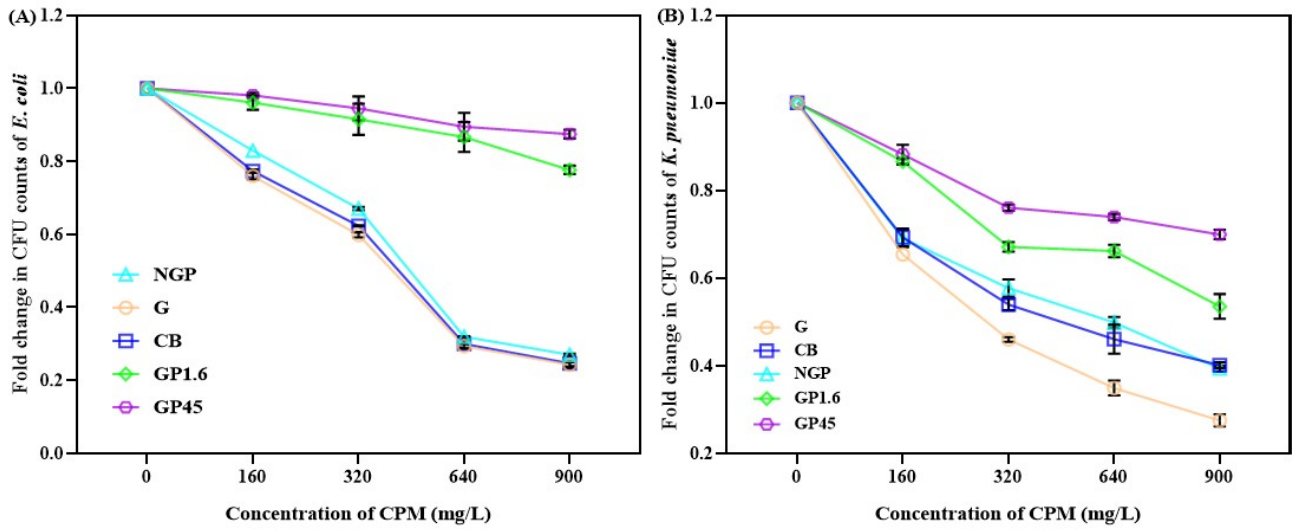

Figure S2. Effects of CPM with different concentrations on the survival of donor (*E. coli*) and recipient (*K. pneumoniae*) bacteria. Conditions (PBS, 8h,  $10^8$  CFU/mL, 20rpm)

## **Text S1**

CB (Carbon black), G (Graphene), NGP (Nano graphite powder), GP1.6 (1.6 micron graphite powder), GP45 (45 micron graphite powder).

CB(particle size:10-20nm),G(thickness:1-2nm),GP1.6(particle size: 8000 mesh ,1.6 microns),GP45(particle size: 325 mesh ,45microns)were purchased from Shanghai McLean Biochemical Technology Co., Ltd., and NGP(particle size:200-600nm)was purchased from Aladdin Chemical Reagent Co., Ltd. CPM is suspended in a certain amount of sterile ultrapure water, and uniformly dispersed by ultrasonic wave (KQ-500E50W) as mother liquor, which is ultrasonicated for 2h before each use.

CAS:G(1034343-98-0),CB(1333-86-4),GP(7782-42-5),NPG(7782-42-5).

AMP(69-52-3),KAN(25389-94-0) ,TET(A500731)and MEM( 96036-03-2 ).

## **Text S2**

### **Transmission electron microscope (TEM)**

Collect the cells in the conjugation transfer experiment system (25°C, 4h, 10<sup>8</sup> CFU/mL), put them in a 1.5mL centrifuge tube, add 2.5% glutaraldehyde solution and store them at 4°C for 12h. Pour off the fixative, and rinse the sample with 0.1M phosphate buffer with pH7.0 for three times, each time lasting 15min; Fix the sample with 1% osmic acid solution for 1-2h; Take out the osmic acid waste liquid carefully, and rinse the sample with 0.1M phosphate buffer with pH7.0 for three times, each time lasting 15min; Dehydrate the sample with gradient concentration (including 30%, 50%, 70%, 80%, 90% and 95% ethanol solution), each concentration is treated for 15min, and then treated with 100% ethanol for 20min; Finally, it was treated with pure

acetone for 20min. Treat the sample with the mixture of embedding agent and acetone (V/V=1/1) for 1h; Treat the sample with the mixture of embedding agent and acetone (V/V=3/1) for 3h; Treating the sample with pure embedding agent overnight; Embedding the infiltrated sample, and heating at 70°C overnight to obtain the embedded sample. Samples were sliced in an ultrathin microtome (LEICA EM UC7) to obtain 70-90nm slices. The slices were stained with lead citrate solution and 50% ethanol saturated solution of uranyl acetate for 5-10 minutes respectively, and then observed under transmission electron microscope after drying.

## References

- Rubini D, Banu SF, Subramani P, Hari BNV, Gowrishankar S, Pandian SK, Wilson A, Nithyanand P (2019): Extracted chitosan disrupts quorum sensing mediated virulence factors in Urinary tract infection causing pathogens. *Pathog Dis* 77
- Zhang Y, Gu AZ, Cen T, Li X, Li D, Chen J (2018): Petrol and diesel exhaust particles accelerate the horizontal transfer of plasmid-mediated antimicrobial resistance genes. *Environ Int* 114, 280-287
